# Supplementary material
Source: publisher figshare collection journal article supplement (https://karger.figshare.com/ndownloader/files/38267658)
Supplement: Supplementary file 1 [file 38267658]

**Supplementary files legends**

Supplementary table. Interventions, outcomes, and results of the trials on patients with PD

Supplementary file S1. PRISMA 2020 Checklist

Supplementary file S2. The search string with the search terminology
